# Supplementary material for: Progression of Diabetic Kidney Disease and Gastrointestinal Symptoms in Patients with Type I Diabetes
Source: Preprints.org preprint supplement (doi:10.20944/preprints202309.0878.v1), 2023-09-14
Supplement: Supplementary file 3 [file supplementary]

Archive with 2 entries (2 files):
- Supplementary files/Supplement 1.pdf
- Supplementary files/Supplement 2.pdf
